# Supplementary material for: Chitosan oligosaccharide attenuates endoplasmic reticulum stress-associated intestinal apoptosis via the Akt/mTOR pathway
Source: Royal Society of Chemistry journal article supplement (doi:10.1039/d1fo01234g), 2021-01-01
Supplement: d1fo01234g1.pdf [file d1fo01234g1.pdf]

## Supporting Information

### Supplemental tables

Table S1. Primer sequences for RT-qPCR analysis

| Genes         | Primers | Sequences (5'-3')        | Size (bp) | Accession no.  |
|---------------|---------|--------------------------|-----------|----------------|
| GRP78         | Forward | ACCAAAATCGCCTGACACCT     | 90        | XM_001927795.5 |
|               | Reverse | TGCGCTCCTTGAGCTTTTTG     |           |                |
| IRE1 $\alpha$ | Forward | GAGCAGCCTTAACCCACACT     | 80        | XM_005668695.1 |
|               | Reverse | GTACCCGCCAGACACTCAA      |           |                |
| eIF2 $\alpha$ | Forward | GCGAAAACTAAAGATGGCGAGA   | 101       | XM_005656337.1 |
|               | Reverse | AGACCCGGCATTTCATAGAGT    |           |                |
| PERK          | Forward | AGACTGTGACTTGGAGGACG     | 151       | XM_003124925.4 |
|               | Reverse | GGATGCGTTATCACAGCCAG     |           |                |
| ATF4          | Forward | TGGCGTATTAGAGGCAGCAG     | 146       | NM_001123078.1 |
|               | Reverse | TTTGTCGGTTACAGCAACGC     |           |                |
| ATF6          | Forward | CCGAAGAGAAGAGCCATCTG     | 127       | XM_001924512.4 |
|               | Reverse | TCCTTTGATTTGCAGGGTTC     |           |                |
| CHOP          | Forward | GTCATTGCCTTTCTCCTTCGG    | 139       | NM_001144845.1 |
|               | Reverse | GGTTTTTGACTCCTCCTCATTTCC |           |                |
| Caspase3      | Forward | TGTGTGCTTCTAAGCCATGG     | 132       | NM_214131.1    |
|               | Reverse | AGTTCTGTGCCTCGGCAG       |           |                |
| Bax           | Forward | CTGACGGCAACTTCAACTGG     | 200       | XM_003127290.5 |
|               | Reverse | CGTCCCAAAGTAGGAGAGGA     |           |                |
| Bcl-2         | Forward | AGCATGCGCCTCTATTTGA      | 120       | XM_021099593.1 |
|               | Reverse | GGCCCGTGGACTTCACTTAT     |           |                |
| Akt           | Forward | GCCAACAGAGACAGAGACCT     | 137       | XM_005664751.3 |
|               | Reverse | TGCCATCGTCTGTGCTCTCA     |           |                |
| mTOR          | Forward | CAGGCATACGGTCGAGACTTAA   | 112       | XM_013998977.1 |
|               | Reverse | CGCCTGAACACGTGGTAATAGA   |           |                |
| TNF- $\alpha$ | Forward | CGTGAAGCTGAAAGACAACCAG   | 121       | NM_214022.1    |
|               | Reverse | GATGGTGTGAGTGAGGAAAACG   |           |                |
| IL-1 $\beta$  | Forward | CGTGCAATGATGACTTTGTCTGT  | 112       | NM_214055.1    |
|               | Reverse | AGAGCCTTCAGCATGTGTGG     |           |                |

|                |         |                         |     |                |
|----------------|---------|-------------------------|-----|----------------|
| IL-10          | Forward | TAATGCCGAAGGCAGAGAGT    | 122 | NM_214041.1    |
|                | Reverse | GGCCTTGCTCTTGTTTTACAC   |     |                |
| Occludin       | Forward | CTACTCGTCCAACGGGAAAG    | 158 | NM_001163647.2 |
|                | Reverse | ACGCCTCCAAGTTACCACTG    |     |                |
| ZO-1           | Forward | CAGAGACCAAGAGCCGTCC     | 171 | XM_005659811.1 |
|                | Reverse | TGCTTCAAGACATGGTTGGC    |     |                |
| ZO-2           | Forward | ATTCGGACCCATAGCAGACATAG | 105 | NM_001206404.1 |
|                | Reverse | GCGTCTCTTGTTCTGTTTTAGC  |     |                |
| IGF-1R         | Forward | CAACCTCCGGCCTTTTACTTT   | 135 | U58370.1       |
|                | Reverse | CAGGAATGTCATCTGCTCCTT   |     |                |
| GLUT2          | Forward | GACACGTTTTGGGTGTTCCG    | 149 | NM_001097417.1 |
|                | Reverse | GAGGCTAGCAGATGCCGTAG    |     |                |
| SGLT1          | Forward | GCAACAGCAAAGAGGAGCGTAT  | 137 | NM_001164021.1 |
|                | Reverse | GCCACAAAACAGGTCATAGGTC  |     |                |
| $\beta$ -actin | Forward | TCCATCGTCCACCGCAAATG    | 124 | XM_003357928.2 |
|                | Reverse | TTCAGGAGGCTGGCATGAGG    |     |                |

---

GRP78, glucose-regulated protein 78; PERK, protein RNA-like ER kinase; IRE1 $\alpha$ , inositol-requiring enzyme 1 $\alpha$ ; ATF6, activating transcription factor 6; eIF2 $\alpha$ , eukaryotic initiation factor 2 $\alpha$ ; ATF4, activating transcription factor 4; CHOP, C/EBP homologous protein; Akt, protein kinase B; mTORC1, mammalian target of rapamycin complex 1; Bcl-2, B-cell lymphoma 2; Bax, Bcl-2-associated X; TNF- $\alpha$ , tumor necrosis factor alpha; IL-1 $\beta$ , interleukin-1 $\beta$ ; IL-10, interleukin-10; ZO-1, zonula occludens-1; ZO-2, zonula occludens-2; IGF-1R, insulin-like growth factor 1 receptor; GLUT2, glucose transporter 2; SGLT1, Na<sup>+</sup>-glucose co-transporter 1

**Table S2. Composition and nutrient levels of the basal diet for weaning piglets**

| Ingredient                             | Content, % | Nutrient content            | Content |
|----------------------------------------|------------|-----------------------------|---------|
| Maize                                  | 27.0       | Digestible energy (Mcal/kg) | 3.56    |
| Extruded maize                         | 23.8       | CP (%)                      | 19.5    |
| Sucrose                                | 3.00       | Calcium (%)                 | 0.76    |
| Lactose                                | 4.00       | Available P (%)             | 0.47    |
| Whey powder                            | 10.0       | Lys (%)                     | 1.50    |
| Extruded full-fat soybean              | 6.00       | Met (%)                     | 0.85    |
| Dehulled soybean meal                  | 6.00       | Trp (%)                     | 1.00    |
| Soy protein concentrate                | 4.50       | Thr (%)                     | 0.26    |
| Milk powder                            | 5.00       |                             |         |
| Fish meal                              | 4.00       |                             |         |
| Porcine plasma protein                 | 3.50       |                             |         |
| L-Lys-HCl                              | 0.60       |                             |         |
| DL-Met                                 | 0.25       |                             |         |
| L-Thr                                  | 0.35       |                             |         |
| L-Trp                                  | 0.05       |                             |         |
| Choline chloride                       | 0.15       |                             |         |
| Limestone                              | 0.80       |                             |         |
| Monocalcium phosphate.H <sub>2</sub> O | 0.40       |                             |         |
| Sodium chloride                        | 0.15       |                             |         |
| Mineral and vitamin premix*            | 0.45       |                             |         |
| Total                                  | 100        |                             |         |

\* Premix supplied the following per kg of diet: Cu (CuSO<sub>4</sub>.5H<sub>2</sub>O) 20mg, Fe (FeSO<sub>4</sub>.7H<sub>2</sub>O) 115 mg, Mn (MnSO<sub>4</sub>.H<sub>2</sub>O) 20 mg, Zn (ZnSO<sub>4</sub>.H<sub>2</sub>O) 115 mg, Se (Na<sub>2</sub>SeO<sub>3</sub>) 0.3 mg, I (KI) 0.3 mg; VA 8,000 IU; VD<sub>3</sub> 2,000 IU; VE 25 IU; VK<sub>3</sub> 1.2 mg; VB<sub>1</sub> 2.5 mg; VB<sub>2</sub> 6.5mg; VB<sub>6</sub> 10 mg; VB<sub>12</sub> 0.05 mg; biotin 0.15 mg; pantothenic acid 20 mg; niacin 45 mg; folic acid 1 mg.

## Supporting Figure Legends

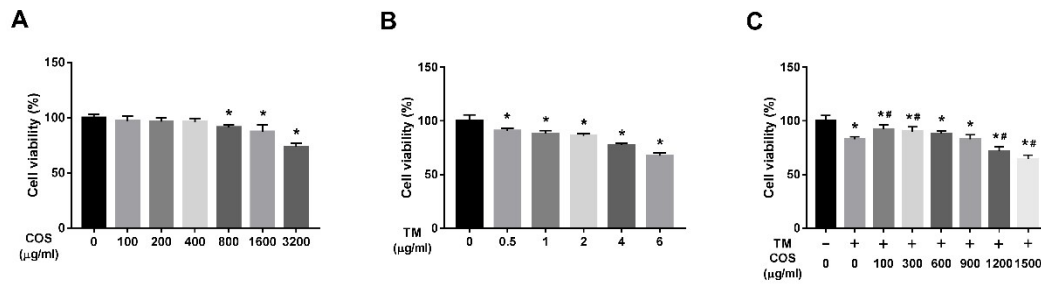

**Figure S1.** Effects of COS or TM on cytotoxicity and viability of IPEC-J2 cells determined using the MTT assay. (A) Cell cytotoxicity of COS. (B) Cell cytotoxicity of TM. (C) Cell viability of COS co-treatment with TM. Data are expressed as means  $\pm$  SEM,  $n=8$ . \*  $P < 0.05$ , compared to blank control group; #  $P < 0.05$ , compared to TM control group.

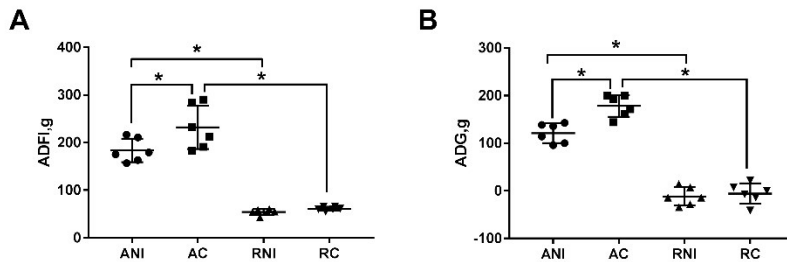

**Figure S2.** Effects of COS on growth performance in piglets with nutritional restriction. (A) ADFI, average daily feed intake. (B) ADG, average daily gain. Data are expressed as means  $\pm$  SEM,  $n=7$ .

\*  $P < 0.05$ .
